# Supplementary material for: Models predict change in plasma triglyceride concentrations and long-chain n-3 polyunsaturated fatty acid proportions in healthy participants after fish oil intervention
Source: PubMed Central journal article supplement (PMC9641003; doi:10.3389/fnut.2022.989716), 2022-10-25

## Supplementary Material

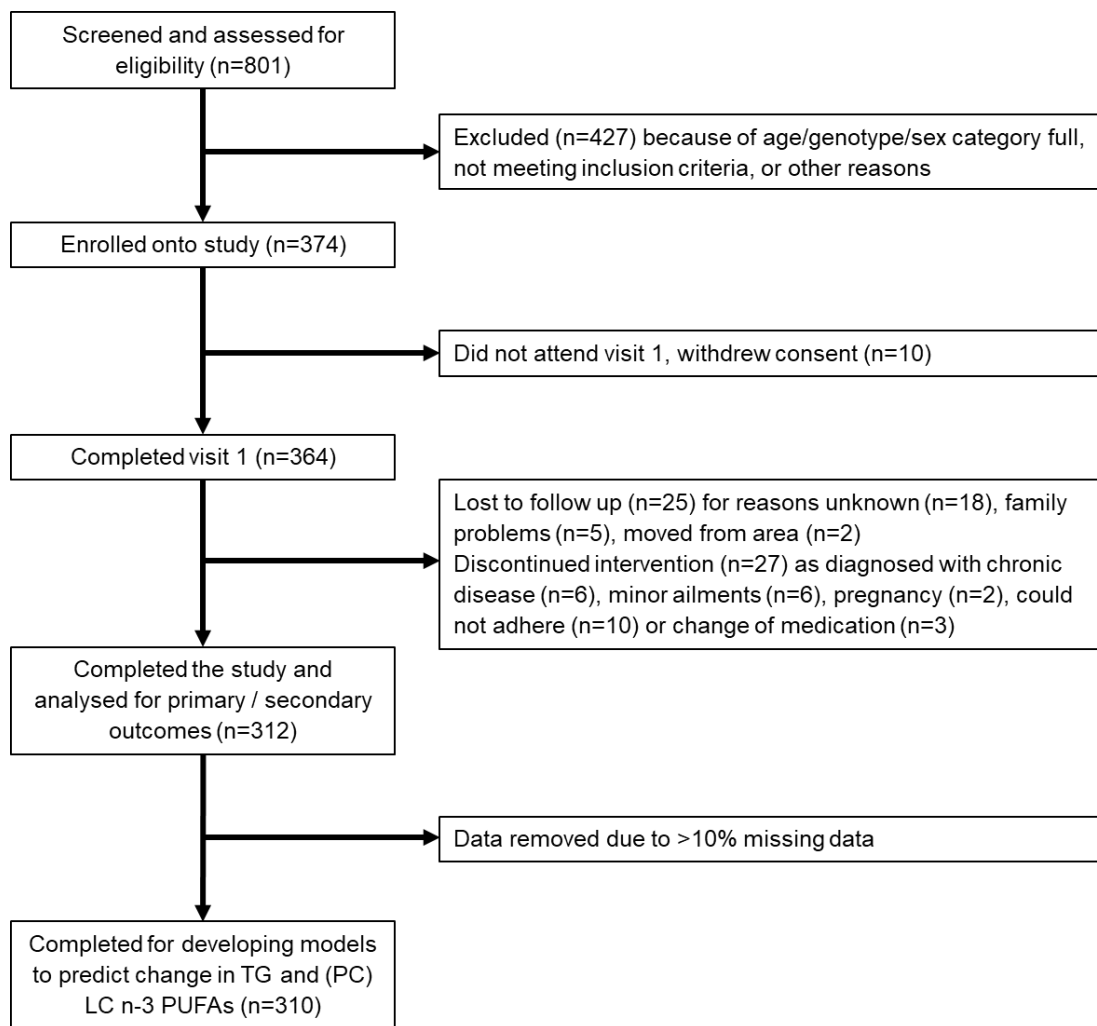

**Supplementary Figure 1.** Participant flow diagram.

**Supplementary Table 1** List of all variables included in the dataset

| Variable name/ code | Variable description/levels | Gene name | SNP reference ID(s) |
|---------------------|-----------------------------|-----------|---------------------|
| Vol_no              | Volunteer identifier        |           |                     |

|           |                                                 |      |                                   |
|-----------|-------------------------------------------------|------|-----------------------------------|
| Age       | Volunteer age (y) at baseline                   |      |                                   |
| Gender    | Male (0), Female (1)                            |      |                                   |
| apoE_code | 2 = E2/E2 + E2/E3, 3 = E3/E3, 4 = E3/E4 + E4/E4 | APOE | <i>rs429358</i> and <i>rs7412</i> |
| eNOS_code | 1 = GG, 2 = GT, 3 = TT                          | eNOS | <i>rs1799983</i>                  |
| BMI       | Volunteer Body Mass Index at baseline           |      |                                   |
| Alcohol   | Units of alcohol consumed/wk                    |      |                                   |
| APOA1_v1  | Plasma APOA1 levels at baseline                 |      |                                   |
| APOE_v1   | Plasma APOE levels at baseline                  |      |                                   |
| CRP_v1    | Plasma CRP levels at baseline                   |      |                                   |
| Glu_v1    | Plasma glucose levels at baseline               |      |                                   |
| HDLC_v1   | Plasma HDL-cholesterol levels at baseline       |      |                                   |
| Ins_v1    | Plasma insulin levels at baseline               |      |                                   |
| NEFA_v1   | Plasma NEFA levels at baseline                  |      |                                   |
| Psel_v1   | Plasma P-selectin levels at baseline            |      |                                   |
| Esel_v1   | Plasma E-selectin levels at baseline            |      |                                   |
| IL-6_v1   | Plasma IL-6 levels at baseline                  |      |                                   |
| IL-10_v1  | Plasma IL-10 levels at baseline                 |      |                                   |
| PAI1_v1   | Plasma PAI-1 levels at baseline                 |      |                                   |
| tPA_v1    | Plasma tPA levels at baseline                   |      |                                   |
| ICAM_v1   | Plasma ICAM levels at baseline                  |      |                                   |
| VCAM_v1   | Plasma VCAM levels at baseline                  |      |                                   |

|               |                                                                                               |       |                  |
|---------------|-----------------------------------------------------------------------------------------------|-------|------------------|
| TNF_v1        | Plasma TNF levels at baseline                                                                 |       |                  |
| vWF_v1        | Plasma vWF levels at baseline                                                                 |       |                  |
| DBP_a/c_0     | Diastolic blood pressure levels before intervention period                                    |       |                  |
| SBP_a/c_0     | Systolic blood pressure levels before intervention period                                     |       |                  |
| TG_a/c_0      | Plasma triglyceride levels before intervention period                                         |       |                  |
| TG_a/c_8      | Plasma triglyceride levels after intervention period (used to calculate TG change score only) |       |                  |
| TG_a/c_change | Triglyceride change between start and end of intervention period (outcome)                    |       |                  |
| TC_a/c_0      | Total plasma cholesterol levels before intervention period                                    |       |                  |
| LDL_a/c_0     | Plasma LDL-cholesterol levels before intervention period                                      |       |                  |
| Fruit_g_d     | Fruit consumption in grams at baseline                                                        |       |                  |
| Veg_g_d       | Vegetable consumption in grams at baseline                                                    |       |                  |
| Fat_percent   | % of calories from fat at baseline                                                            |       |                  |
| Mono_fat      | Grams of monosaturated fat at baseline                                                        |       |                  |
| Polyunsat_fat | Grams of polyunsaturated fat at baseline                                                      |       |                  |
| Sat_fat       | Grams of saturated fat at baseline                                                            |       |                  |
| Energy_MJ     | Energy consumed per day, MJ                                                                   |       |                  |
| Oilyfish_wk   | Portions of oily fish consumed/wk                                                             |       |                  |
| apoA5_1131    | 1 = AA, 2 = GA                                                                                | APOA5 | <i>rs662799</i>  |
| apoA5_S19W    | 1 = GG, 2 = CG, 3 = CC                                                                        |       | <i>rs3135506</i> |

## Supplementary Material

|                 |                                                            |               |                   |
|-----------------|------------------------------------------------------------|---------------|-------------------|
| LPL_Hind_III    | 1 = TT, 2 = TG, 3 = GG                                     | LPL           | <i>rs320</i>      |
| LPL_S447X       | 1 = CC, 2 = GC, 3 = GG                                     |               | <i>rs328</i>      |
| apoC3_455       | 1 = TC, 2 = TT, 3 = CC                                     | APOC3         | <i>rs2854116</i>  |
| apoA4_S347Th    | 1 = AA, 2 = GA, 3 = GG                                     | APOA4         | <i>rs5675</i>     |
| Comp_C3_1       | 1 = GG, 2 = GA, 3 = AA                                     | C3            | <i>rs11569562</i> |
| Comp_C3_2       | 1 = TT, 2 = TC, 3 = CC                                     |               | <i>rs2250656</i>  |
| LIPC_250        | 1 = GG, 2 = GA, 3 = AA                                     | LIPC          | <i>rs2070895</i>  |
| LIPC_514        | 1 = CC, 2 = TC, 3 = TT                                     |               | <i>rs1800588</i>  |
| CYP7A1_204      | 1 = GG, 2 = TG, 3 = TT                                     | CYP7A1        | <i>rs3808607</i>  |
| TNFA_238        | 1 = GG, 2 = AG, 3 = AA                                     | TNF- $\alpha$ | <i>rs361525</i>   |
| TNFA_308        | 1 = GG, 2 = GA, 3 = AA                                     |               | <i>rs1800629</i>  |
| TNFA_308_a/c_0  | Measure of TNF- $\alpha$ levels before intervention period |               |                   |
| LTA_252         | 1 = AA, 2 = GA, 3 = GG                                     | LTA           | <i>rs909253</i>   |
| IL1B_511        | 1 = CC, 2 = TC, 3 = TT                                     | IL-1 $\beta$  | <i>rs16944</i>    |
| IL1B_6054       | 1 = GG, 2 = AG, 3 = AA                                     |               | <i>rs1143643</i>  |
| IL6_174         | 1 = GG, 2 = CG, 3 = CC                                     | IL-6          | <i>rs1800795</i>  |
| IL10_1082       | 1 = TT, 2 = CT, 3 = CC                                     | IL-10         | <i>rs1800896</i>  |
| NFkB_94         | 1 = ATTG:-, 2 = ATTG:ATTG, 3 = :-                          | NFkB          | <i>rs28720239</i> |
| LepR_G_A        | 1 = CC, 2 = TC, 3 = TT                                     | LEPR          | <i>rs3790433</i>  |
| Adiponectin_276 | 1 = CC, 2 = CA, 3 = AA                                     | Adiponectin   | <i>rs1501299</i>  |

|                       |                                                     |               |                   |
|-----------------------|-----------------------------------------------------|---------------|-------------------|
| IR_S1                 | 1 = CC, 2 = TC, 3 = TT                              | IRS1          | <i>rs1801278</i>  |
| PI3Kinase             | 1 = GG, 2 = GA, 3 = AA                              | PI3Kinase     | <i>rs3730089</i>  |
| VLDL_R                | 1 = AA, 2 = CA, 3 = CC                              | VLDLR         | <i>rs1454626</i>  |
| p22phox_242           | 1 = CC, 2 = CT, 3 = TT                              | NADPHox       | <i>rs4673</i>     |
| p22phox_nitrate_a/c_0 | Measure of NADPHox before intervention period       |               |                   |
| EDN1_198              | 1 = GG, 2 = TG, 3 = TT                              | EDN1          | <i>rs5370</i>     |
| UTS2_T21M             | 1 = AA, 2 = GA, 3 = GG                              | UTS2          | <i>rs228648</i>   |
| UTS2R_8515            | 1 = CC, 2 = TC, 3 = TT                              | UTS2R         | <i>rs35373706</i> |
| CYP1A1_2_I462V        | 1 = AA, 2 = GA, 3 = GG                              | CYP1A1.2      | <i>rs1048943</i>  |
| FADS174575            | 1 = CC, 2 = CG, 3 = GG                              | FADS2         | <i>rs174575</i>   |
| FADS174575_ADMA_a/c_0 | Measure of FADS2 before intervention period         |               |                   |
| ELOVL1                | 1 = GG, 2 = GA, 3 = AA                              | ELOVL2        | <i>rs953413</i>   |
| FABP1_Th94A1          | 1 = TT, 2 = TC, 3 = CC                              | FABP1         | <i>rs2241883</i>  |
| PPARa_L162V           | 1 = CC, 2 = GC, 3 = GG                              | PPAR $\alpha$ | <i>rs1800206</i>  |
| PPARa_3UTR            | 1 = GG, 2 = GA, 3 = AA                              |               | <i>rs6008259</i>  |
| PPARa_3UTR_RQ_a_0     | Measure of PPAR $\alpha$ before intervention period |               |                   |
| PPARa_5UTR            | 1 = CC, 2 = CA, 3 = AA                              |               | <i>rs535543</i>   |
| SCARB1                | 1 = CC, 2 = TC, 3 = TT                              | SCARB1        | <i>rs4238001</i>  |
| FABP2                 | 1 = TT, 2 = AT, 3 = AA                              | FABP2         | <i>rs1799883</i>  |
| CD36_1                | 1 = GG, 2 = AG, 3 = AA                              | CD36          | <i>rs1527483</i>  |
| CD36_2                | 1 = GG, 2 = GC, 3 = CC                              |               | <i>rs1049673</i>  |

|                |                                                                                           |  |                  |
|----------------|-------------------------------------------------------------------------------------------|--|------------------|
| CD36_3         | 1 = AA, 2 = GA, 3 = GG                                                                    |  | <i>rs1761667</i> |
| CD36_4         | 1 = AA, 2 = GA, 3 = GG                                                                    |  | <i>rs1984112</i> |
| C14_0_a/c_0    | Plasma fatty acid levels of C14:0 before intervention period                              |  |                  |
| C16_0_a/c_0    | Plasma fatty acid levels of C16:0 before intervention period                              |  |                  |
| C18_0_a/c_0    | Plasma fatty acid levels of C18:0 before intervention period                              |  |                  |
| C16_1_a/c_0    | Plasma fatty acid levels of C16:1 before intervention period                              |  |                  |
| C18_1_a/c_0    | Plasma fatty acid levels of C18:1 before intervention period                              |  |                  |
| C18_2_a/c_0    | Plasma fatty acid levels of C18:2 before intervention period                              |  |                  |
| C20_3_a/c_0    | Plasma fatty acid levels of C20:3 before intervention period                              |  |                  |
| C20_4_a/c_0    | Plasma fatty acid levels of C20:4 before intervention period                              |  |                  |
| C20_5_a/c_0    | Plasma fatty acid levels of C20:5 before intervention period                              |  |                  |
| C22_5_a/c_0    | Plasma fatty acid levels of C22:5 before intervention period                              |  |                  |
| C22_6_a/c_0    | Plasma fatty acid levels of C22:6 before intervention period                              |  |                  |
| O3I_a/c_0      | Plasma EPA+DHA levels before intervention period (used to calculate TG change score only) |  |                  |
| O3I_a/c_change | Change in plasma EPA+DHA levels between start and end of intervention period (outcome)    |  |                  |

APOA4 – apolipoprotein A4 gene; APOA5 – apolipoprotein A5 gene; APOC3 – apolipoprotein C3 gene; APOE – apolipoprotein E gene; C3 – complement component 3 gene; CD36 – scavenger receptor gene; CYP1A1.2 – cytochrome

p450 gene; CYP7A1 – cholesterol 7 alpha hydrolase gene; EDN1 – Endothelin-1 gene; ELOVL2 – fatty acid elongase gene; eNOS – endothelial nitric oxide synthase gene; FABP1 – fatty acid binding protein 1 gene; FABP2 – fatty acid binding protein 2 gene; FADS2 – delta 6 desaturase gene; IL-6 – interleukin 6 gene; IL-10 – interleukin 10; IL-1 $\beta$  – interleukin 1 beta gene; IRS1 – insulin receptor substrate 1 gene; LEPR – leptin receptor gene; LIPC – hepatic lipase gene; LPL – lipoprotein lipase gene; NADPHox – nicotinamide adenine dinucleotide phosphate oxidase; PIK3R1 – P13 Kinase regulatory subunit 1 $\alpha$  gene; PPAR $\alpha$  - peroxisome proliferator activator receptor alpha; SCARB1 – scavenger receptor class B1 gene; TNF- $\alpha$  - tumour necrosis factor alpha gene; UTS2 – urotensin 2 gene; UTS2R urotensin 2 receptor gene; VLDLR – very low density lipoprotein receptor gene.

## Supplementary Figure 2

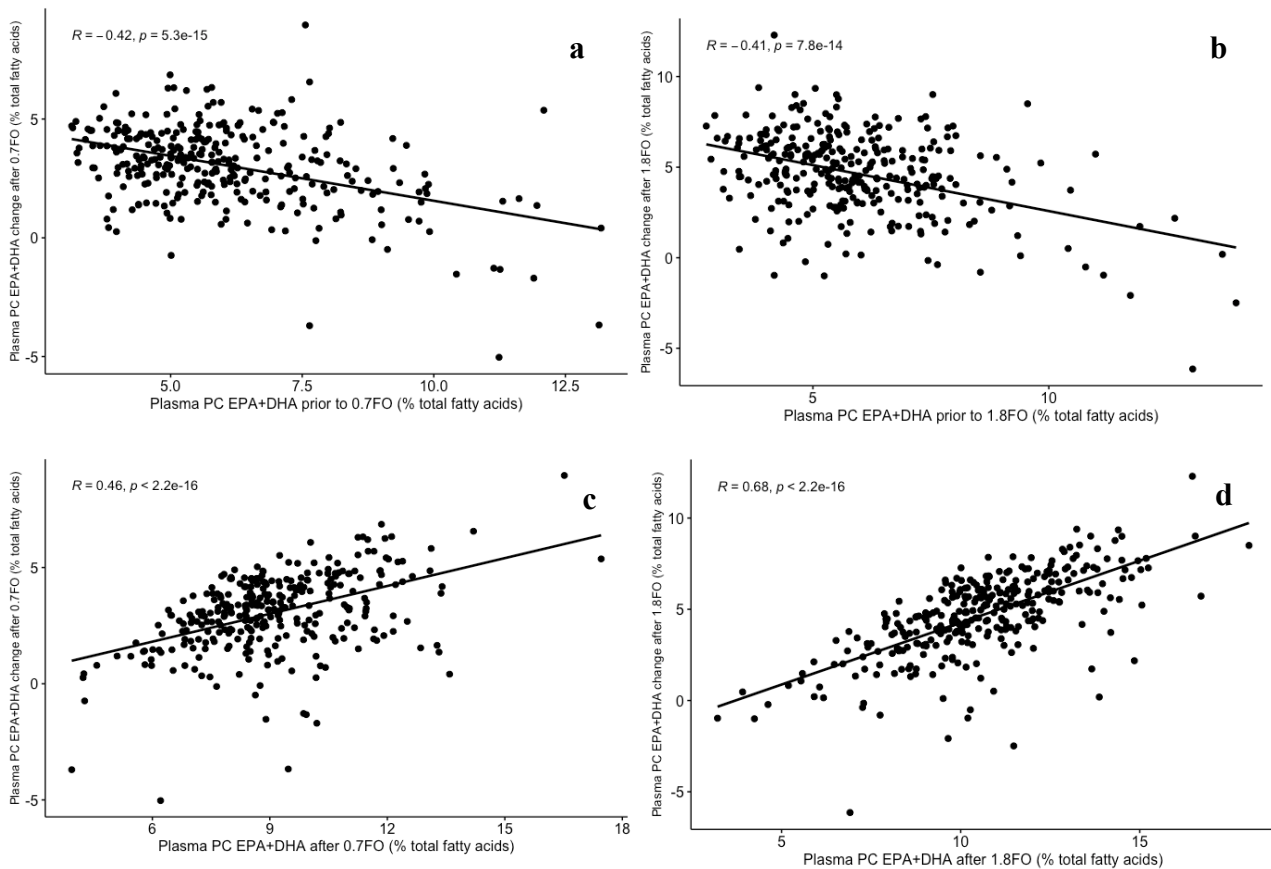

**Supplementary Figure 2.** Relationship between initial and final plasma PC EPA+DHA with plasma PC EPA+DHA change. **a** relationship between pre-0.7FO plasma PC EPA+DHA with EPA+DHA change after 0.7FO; **b** relationship between pre-1.8FO plasma PC EPA+DHA with EPA+DHA change after 1.8FO; **c** relationship between plasma PC EPA+DHA after 0.7FO with EPA+DHA change; **d** relationship between plasma PC EPA+DHA after 1.8FO with EPA+DHA change. 0.7FO – 0.7 g/d EPA+DHA; 1.8FO – 1.8 g/d EPA+DHA; PC – plasma phosphatidylcholine.

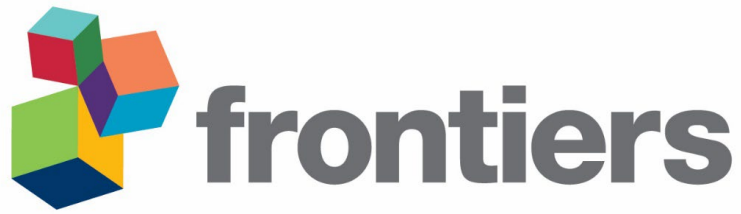

Supplement: Data_Sheet_1.pdf [file Data_Sheet_1.pdf]
